# Supplementary material for: Impact of Antipsychotic Review and Nonpharmacological Intervention on Antipsychotic Use, Neuropsychiatric Symptoms, and Mortality in People With Dementia Living in Nursing Homes: A Factorial Cluster-Randomized Controlled Trial by the Well-Being and Health for People With Dementia (WHELD) Program
Source: Atypon-hosted journal article supplement (doi:10.1176/appi.ajp.2015.15010130), 2015-11-20
Supplement: appi.ajp.2015.15010130.ds001.pdf [file appi.ajp.2015.15010130.ds001.pdf]

FIGURE 1. Factorial Design of Study of Nonpharmacological Interventions for Nursing Home Residents With Dementia

| Convenience List Sample | Intervention Allocation Sample | Patient-Centered Care | Antipsychotic Review | Social Interaction Intervention | Exercise Intervention |
|-------------------------|--------------------------------|-----------------------|----------------------|---------------------------------|-----------------------|
| 1                       | 9                              | X                     |                      |                                 |                       |
| 2                       | 10                             | X                     |                      |                                 | X                     |
| 3                       | 11                             | X                     |                      | X                               |                       |
| 4                       | 12                             | X                     |                      | X                               | X                     |
| 5                       | 13                             | X                     | X                    |                                 |                       |
| 6                       | 14                             | X                     | X                    |                                 | X                     |
| 7                       | 15                             | X                     | X                    | X                               |                       |
| 8                       | 16                             | X                     | X                    | X                               | X                     |

FIGURE 2. CONSORT Diagram Showing Flow of Participants Through Study of Nonpharmacological Interventions for Nursing Home Residents With Dementia

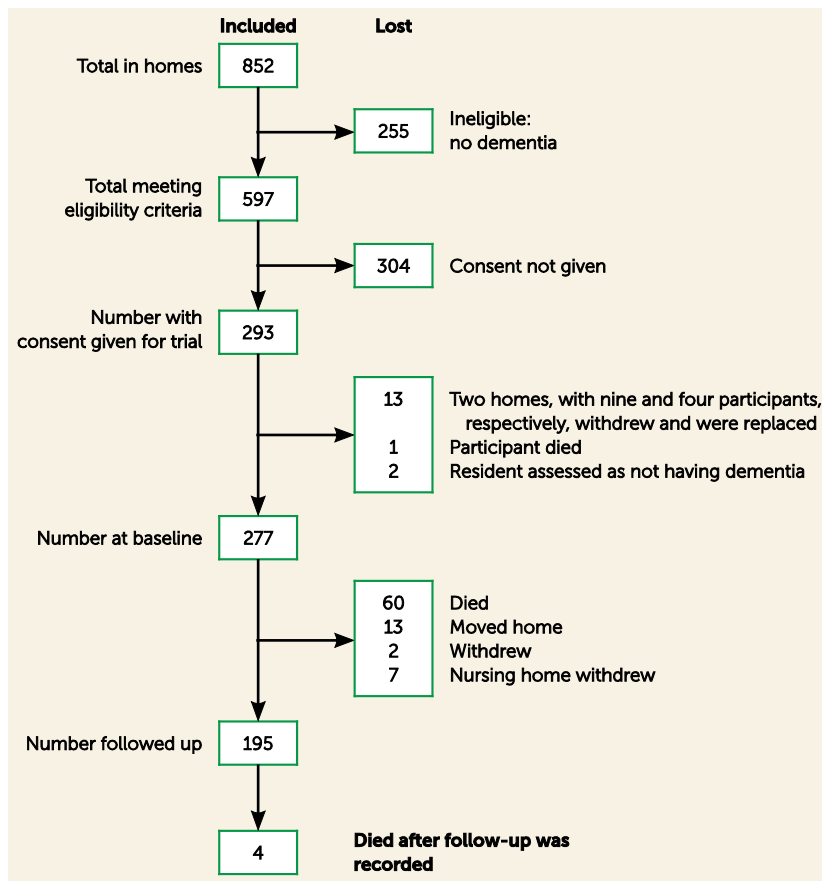

**Table S1. Comparison of model including baseline covariates and interaction effects compared with the model just adjusting for baseline covariates when significant interaction effects were present**

|                                           | Adjusted for Baseline Covariates And Interaction effects |          |                 | Adjusted for only baseline covariates |          |                |
|-------------------------------------------|----------------------------------------------------------|----------|-----------------|---------------------------------------|----------|----------------|
| <b>Continuous Outcomes</b>                |                                                          |          |                 |                                       |          |                |
|                                           | Mean Diff                                                | P-value  | 95% CI          | Mean Diff                             | P-value  | 95% CI         |
| <b>CSDD (N=178)</b>                       |                                                          |          |                 |                                       |          |                |
| Antipsychotic Review                      | -1.70                                                    | 0.183    | -4.29 to 0.90   | 1.43                                  | 0.201    | -0.85 to 3.71  |
| Exercise                                  | -1.21                                                    | 0.425    | -4.35 to 1.93   | -3.41                                 | 0.022    | -6.72 to -0.56 |
| Antipsychotic Review # Exercise           | 4.65                                                     | 0.015    | 1.03 to 8.27    | —                                     | —        | —              |
| <b>NPI-NH total score (N=193)</b>         |                                                          |          |                 |                                       |          |                |
| Antipsychotic Review                      | 7.37                                                     | 0.017    | 1.53 to 13.22   | 3.27                                  | 0.087    | -0.54 to 7.07  |
| Social Interaction                        | 5.45                                                     | 0.046    | 0.12 to 10.77   | 1.46                                  | 0.482    | -2.86 to 5.78  |
| Antipsychotic Review # Social Interaction | -7.81                                                    | 0.030    | -14.74 to -0.88 | —                                     | —        | —              |
| <b>Binary Outcomes</b>                    |                                                          |          |                 |                                       |          |                |
|                                           | Odds Ratio                                               | P-values | 95% CI          | Odds Ratio                            | p values | 95% CI         |
| <b>Death (N=255)</b>                      |                                                          |          |                 |                                       |          |                |
| Antipsychotic Review                      | 0.67                                                     | 0.141    | 0.39 to 1.14    | 0.93                                  | 0.739    | 0.62 to 1.41   |
| Social Interaction                        | 0.26                                                     | <0.001   | 0.13 to 0.51    | 0.37                                  | 0.001    | 0.21 to 0.66   |
| Antipsychotic Review # Social Interaction | 2.06                                                     | 0.033    | 1.06 to 4.01    | —                                     | —        | —              |

**Table S2. Sensitivity analyses based on the worst and best case data scenarios**

| <b>Worst Case Scenario</b>       |              |                   |                  |                        |
|----------------------------------|--------------|-------------------|------------------|------------------------|
|                                  | <b>Score</b> | <b>Odds Ratio</b> | <b>P value</b>   | <b>95% CI</b>          |
| <b>Antipsychotic Use (N=273)</b> |              |                   |                  |                        |
| Antipsychotic Review             | -            | <b>0.53</b>       | <b>0.039</b>     | <b>0.29 to 0.97</b>    |
| Social Interaction               | —            | 0.50              | 0.012            | 0.29 to 0.85           |
| Exercise                         | —            | 1.53              | 0.163            | 0.84 to 2.79           |
| <b>CMAI (N=275)</b>              |              |                   |                  |                        |
| Antipsychotic Review             | 7.37         | —                 | 0.102            | -1.64 to 16.38         |
| Social Interaction               | 4.21         | —                 | 0.301            | -4.18 to 12.60         |
| Exercise                         | -2.79        | —                 | (0.392)          | -9.52 to 3.95          |
| <b>CSDD (N=275)</b>              |              |                   |                  |                        |
| Antipsychotic Review             | 0.71         | —                 | 0.603            | 2.13 to 3.55           |
| Social Interaction               | 3.61         | —                 | 0.126            | 1.14 to 8.36           |
| Exercise                         | <b>4.74</b>  | —                 | <b>0.023</b>     | <b>0.76 to 8.72</b>    |
| <b>Death (N=277)</b>             |              |                   |                  |                        |
| Antipsychotic Review             | —            | 0.68              | 0.153            | 0.40 to 1.16           |
| Social Interaction               | —            | <b>0.40</b>       | <b>0.024</b>     | <b>0.18 to 0.89</b>    |
| Exercise                         | —            | 1.24              | 0.378            | 0.77 to 2.00           |
| <b>NPI-NH (N=275)</b>            |              |                   |                  |                        |
| Antipsychotic Review             | 9.09         | —                 | 0.045            | 0.21 to 17.96          |
| Social Interaction               | 3.99         | —                 | 0.206            | -2.45 to 10.43         |
| Exercise                         | <b>-5.34</b> | —                 | <b>0.033</b>     | <b>-10.18 to -0.51</b> |
| <b>Best Case Scenario</b>        |              |                   |                  |                        |
|                                  | <b>Score</b> | <b>Odds Ratio</b> | <b>P value</b>   | <b>95% CI</b>          |
| <b>Antipsychotic Use (n =)</b>   |              |                   |                  |                        |
| Antipsychotic Review             | -            | <b>0.21</b>       | <b>0.004</b>     | <b>0.07 to 0.60</b>    |
| Social Interaction               | —            | 0.48              | 0.170            | 0.17 to 1.37           |
| Exercise                         | —            | 1.44              | 0.483            | 0.52 to 3.94           |
| <b>CMAI (N=194)</b>              |              |                   |                  |                        |
| Antipsychotic Review             | 5.15         | —                 | 0.115            | -1.40 to 11.69         |
| Social Interaction               | 5.18         | —                 | 0.112            | -1.36 to 11.72         |
| Exercise                         | -1.61        | —                 | 0.527            | -6.91 to 3.69          |
| <b>CSDD (N=194)</b>              |              |                   |                  |                        |
| Antipsychotic Review             | 0.47         | —                 | 0.621            | -1.51 to 2.45          |
| Social Interaction               | 2.75         | —                 | 0.115            | -0.75 to 6.25          |
| Exercise                         | 2.64         | —                 | (0.057)          | -0.09 to 5.36          |
| <b>Death (N=255)</b>             |              |                   |                  |                        |
| Antipsychotic Review             | —            | 0.59              | 0.066            | 0.34 to 1.04           |
| Social Interaction               | —            | <b>0.27</b>       | <b>&lt;0.001</b> | <b>0.14 to 0.52</b>    |
| Exercise                         | —            | 1.18              | 0.447            | 0.77 to 1.81           |
| <b>NPI-NH (N=193)</b>            |              |                   |                  |                        |
| Antipsychotic Review             | 6.60         | —                 | 0.025            | 0.97 to 12.24          |
| Social Interaction               | 5.10         | —                 | 0.082            | -0.73 to 10.92         |
| Exercise                         | -3.74        | —                 | 0.049            | -7.45 to -0.03         |
